# Supplementary material
Source: PubMed Central journal article supplement (PMC4936348)
Supplement: IAI.00134-16_zii999091747so1.pdf [file IAI.00134-16_zii999091747so1.pdf]

**FIG S1 Okahashi et al**

**A**

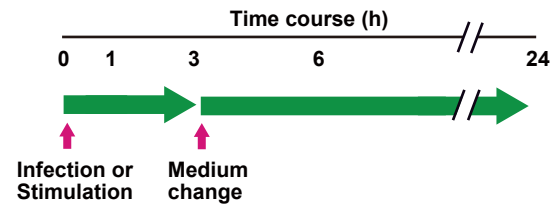

**B**

| Time (h)                        | 1 | 3 | 6 | 24 |
|---------------------------------|---|---|---|----|
| <b>Staining</b>                 |   |   |   |    |
| Trypan blue (Fig. 1)            |   |   |   | ■  |
| Live/Dead (Fig. S3)             | ■ | ■ |   |    |
| LysoTracker (Figs. 3, 4, 7 & 8) | ■ | ■ | ■ |    |
| Acridine orange (Fig. 4)        |   | ■ |   |    |
| LAMP-1 (Figs. 5, 6, 7 & 8)      |   | ■ | ■ | ■  |
| Cathepsin B (Fig. 6)            |   |   | ■ |    |
| Actin (Fig. 9)                  |   |   |   | ■  |

**FIG S1** Experimental design of this study. (A) RAW 264 cells were exposed to *S. oralis* WT, *spxB* KO, *S. mutans* or  $H_2O_2$  for 3 h. The cells were washed with PBS, and cultured for an additional 21 h (total 24 h) in fresh medium containing antibiotics. (B) The cells were stained at indicated time after the treatment.
