# Supplementary material
Source: PubMed Central journal article supplement (PMC4936348)
Supplement: IAI.00134-16_zii999091747so2.pdf [file IAI.00134-16_zii999091747so2.pdf]

FIG S2 Okahashi et al

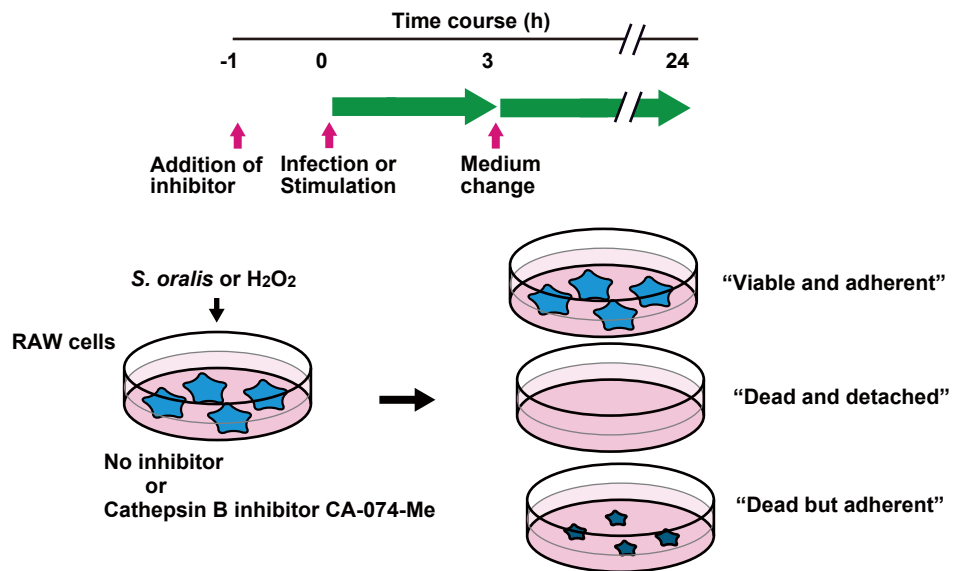

**FIG S2** Effect of cathepsin B inhibitor on cell death and detachment of the dead cells. RAW 264 cells were treated with cathepsin B inhibitor CA-074-Me (20  $\mu$ M) for 1h followed by the exposure to *S. oralis* WT (MOI = 100, 200) or H<sub>2</sub>O<sub>2</sub> (1 mM) for 3 h. The cells were washed with PBS, and cultured for an additional 21 h (total 24 h) in fresh medium containing CA-074-Me (10  $\mu$ M) and antibiotics. Control cells were viable and adhered to the bottom of the culture plate (viable and adherent). *S. oralis* and H<sub>2</sub>O<sub>2</sub> induced cell death. More than 50% of the dead cells were detached and lost from the culture plate (dead and detached), and other dead cells were still attached (dead but adherent).

**Note that without cathepsin inhibitor (CA-074), the “dead and detached” cells were dominant.**
