# Supplementary material
Source: PubMed Central journal article supplement (PMC4936348)
Supplement: IAI.00134-16_zii999091747so3.pdf [file IAI.00134-16_zii999091747so3.pdf]

**FIG S3 Okahashi et al**

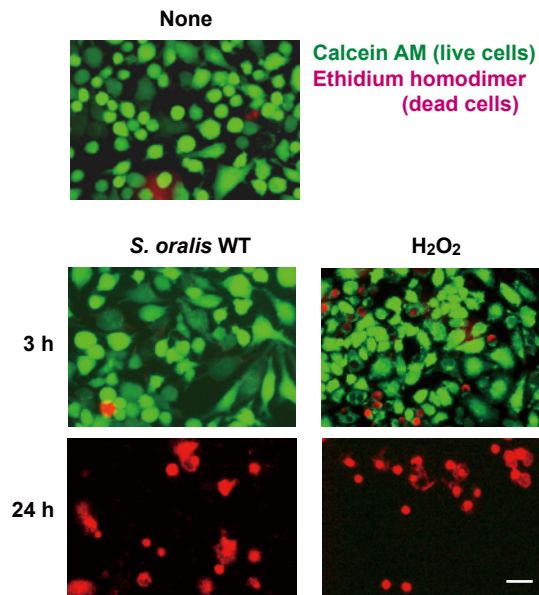

**FIG S3** Live/Dead staining of RAW 264 cells exposed to *S. oralis* WT or H<sub>2</sub>O<sub>2</sub>. RAW 264 cells were exposed to *S. oralis* WT strain at an MOI of 200 or 1 mM H<sub>2</sub>O<sub>2</sub> for 3 h, washed with PBS, and cultured for an additional 21 h in fresh medium containing antibiotics. The cells were then stained with Live/Dead Staining Kit (PromoCell, Heiderberg, Germany), and observed using a Carl Zeiss Axioplain 2 fluorescent microscope system. Ethidium homodimer III (red fluorescence) stained the nuclear DNA of dead cells, while calcein AM (green fluorescence) stained live cells. Bar = 20 mm.

**Note that most cells were still alive at 3 h after exposure.**
